# Supplementary material for: Temperature Affects the Time Required to Discern the Relationship between Primary Production and Export Production in the Ocean
Source: MDPI journal article supplement (doi:10.3390/w13213085), 2021-11-03
Supplement: s1 [file s1]

Archive with 2 entries (2 files):
- Supplementary Materials tables.xlsx
- Supplementary Materials.pdf
