# Supplementary material for: Temperature Affects the Time Required to Discern the Relationship between Primary Production and Export Production in the Ocean
Source: MDPI journal article supplement (doi:10.3390/w13213085), 2021-11-03
Supplement: s1 [file s1 › Supplementary Materials tables.xlsx]

## Sheet: ef
NPP (mg C m-3 d-1)	1024	512	256	128	64	32	16	8	4	2	1	0.5
temp (oC)
-1.8	0.37577	0.35941	0.36216	0.38534	0.3947	0.37932	0.38898	0.38857	0.16689	0.19636	0.19755	0.18266
0	0.35173	0.34556	0.35407	0.37536	0.39911	0.40534	0.42375	0.40141	0.17654	0.20049	0.18745	0.17794
5	0.34601	0.35187	0.33994	0.36301	0.34679	0.35227	0.36342	0.18051	0.1951	0.18386	0.16863	0.15582
10	0.36464	0.35512	0.35843	0.36535	0.35361	0.35163	0.35586	0.1927	0.19232	0.14265	0.15206	0.17259
15	0.34346	0.34415	0.34598	0.33739	0.33402	0.33464	0.18062	0.17783	0.15039	0.15663	0.17383	0.18159
20	0.32439	0.32472	0.3212	0.23889	0.19827	0.18098	0.17286	0.16912	0.15215	0.1696	0.17945	0.18805
25	0.30905	0.30685	0.30675	0.17958	0.1758	0.1785	0.14356	0.15311	0.17138	0.18085	0.19006	0.19627
30	0.28885	0.29966	0.29695	0.16933	0.17219	0.16815	0.15367	0.17158	0.18052	0.18962	0.19601	0.21633

## Sheet: f2L
NPP (mg C m-3 d-1)	1024	512	256	128	64	32	16	8	4	2	1	0.5
temp (oC)
-1.8	0.2826	0.2559	0.2544	0.2933	0.3083	0.2835	0.2962	0.2884	0.1998	0.2001	0.1528	0.0965
0	0.2636	0.2493	0.265	0.3023	0.3392	0.3456	0.3698	0.3314	0.2121	0.1965	0.1322	0.0859
5	0.3083	0.3237	0.2936	0.3499	0.3082	0.3219	0.3401	0.2499	0.219	0.1491	0.1011	0.0703
10	0.4609	0.4267	0.4362	0.4523	0.4069	0.3879	0.3651	0.2464	0.1868	0.0704	0.066	0.0751
15	0.5143	0.5309	0.5687	0.4676	0.4399	0.3854	0.2541	0.1885	0.1324	0.0962	0.09	0.0787
20	0.575	0.4971	0.5669	0.5135	0.3947	0.2889	0.2052	0.1493	0.0933	0.1031	0.0901	0.0706
25	0.5771	0.4869	0.5299	0.3924	0.3103	0.2498	0.1482	0.124	0.1228	0.1096	0.0869	0.0647
30	0.6525	0.586	0.4386	0.3265	0.2656	0.2041	0.148	0.1444	0.1295	0.1037	0.0782	0.1081

## Sheet: f3
NPP (mg C m-3 d-1)	1024	512	256	128	64	32	16	8	4	2	1	0.5
temp (oC)
-1.8	0.21093	0.18984	0.1844	0.21642	0.22839	0.21233	0.22436	0.22116	0.24649	0.24502	0.17782	0.081492
0	0.18258	0.16923	0.18214	0.21004	0.23282	0.23727	0.25326	0.24067	0.24228	0.2236	0.12754	0.058057
5	0.17348	0.1843	0.16445	0.20211	0.17663	0.19072	0.20858	0.23079	0.20062	0.11363	0.08828	0.097459
10	0.21818	0.20399	0.20959	0.21826	0.20056	0.19566	0.18529	0.18059	0.118	0.089731	0.089855	0.11141
15	0.20435	0.21368	0.23231	0.19396	0.18773	0.15758	0.14547	0.089048	0.13664	0.16212	0.18511	0.13101
20	0.19283	0.15946	0.20177	0.22264	0.18941	0.13101	0.074814	0.054876	0.063311	0.049793	0.048792	0.046785
25	0.15822	0.12422	0.15185	0.15117	0.10905	0.073951	0.063307	0.06695	0.0651	0.068912	0.065815	0.050105
30	0.15999	0.13462	0.082432	0.087353	0.059982	0.050017	0.058916	0.061872	0.046093	0.03518	0.023765	0.016502

## Sheet: f5
NPP (mg C m-3 d-1)	1024	512	256	128	64	32	16	8	4	2	1	0.5
temp (oC)
-1.8	0.8345	0.82634	0.83143	0.84084	0.84218	0.83793	0.84215	0.847	0.78373	0.80539	0.79383	0.70883
0	0.82208	0.81776	0.82522	0.83774	0.8462	0.84962	0.85689	0.85661	0.79089	0.80531	0.75326	0.66908
5	0.82514	0.83031	0.81824	0.83827	0.82559	0.83056	0.84378	0.79543	0.80123	0.73933	0.51598	0.36248
10	0.84881	0.84232	0.84495	0.85111	0.84353	0.84612	0.86066	0.79609	0.76344	0.32363	0.31166	0.33631
15	0.84797	0.85052	0.85969	0.84261	0.84261	0.84309	0.76232	0.71106	0.41851	0.34555	0.33165	0.32511
20	0.84689	0.8324	0.85582	0.84558	0.81162	0.75748	0.68587	0.49723	0.30544	0.3295	0.30842	0.23171
25	0.8295	0.79919	0.83106	0.77705	0.73211	0.70365	0.36622	0.32754	0.32358	0.31868	0.24859	0.16269
30	0.84434	0.8357	0.75377	0.70121	0.67159	0.47308	0.3257	0.31851	0.3162	0.24796	0.16341	0.11778

## Sheet: f6
NPP (mg C m-3 d-1)	1024	512	256	128	64	32	16	8	4	2	1	0.5
temp (oC)
-1.8	0.48384	0.46607	0.47249	0.498	0.50946	0.48956	0.50437	0.51024	0.51352	0.54218	0.50146	0.44961
0	0.45901	0.45448	0.463	0.48821	0.52219	0.53472	0.58695	0.55278	0.51365	0.51031	0.45998	0.43789
5	0.45964	0.46682	0.45279	0.48277	0.46087	0.46862	0.49398	0.49977	0.49568	0.45006	0.31132	0.25713
10	0.51036	0.48667	0.49472	0.51301	0.48691	0.48769	0.50791	0.48373	0.49314	0.24753	0.24267	0.24792
15	0.49278	0.50569	0.5621	0.47901	0.47805	0.47961	0.44861	0.43978	0.27539	0.25465	0.24832	0.25228
20	0.47888	0.45928	0.50034	0.52463	0.47535	0.44688	0.42856	0.30139	0.23782	0.24074	0.24565	0.2269
25	0.4504	0.43387	0.45884	0.44705	0.4323	0.4604	0.2575	0.2458	0.24042	0.24929	0.23594	0.2005
30	0.47014	0.47173	0.4227	0.42109	0.42858	0.28905	0.24401	0.23867	0.24624	0.23276	0.19896	0.17512
